# Supplementary material for: The enzymatic synthesis of lactose caprate using Candida rugosa lipase immobilized into ZIF-8 and investigation of its anticancer applications against K562 leukemia and HeLa cancer cells
Source: Royal Society of Chemistry journal article supplement (doi:10.1039/d3ra04632j), 2023-01-01
Supplement: d3ra04632j1.pdf [file d3ra04632j1.pdf]

## **Supporting Information**

### **Enzymatically Synthesized Lactose Caprate using Immobilized *Candida Rugosa* Lipase into ZIF-8 and Investigation of its Anticancer Applications against K562 Leukemia and Hela Cancer Cells**

Effat Karimian,<sup>a</sup> Afsaneh Marandi,<sup>a</sup> Reihaneh Kardanpour,<sup>a</sup> Sara Rafiei,<sup>a</sup> Zahra Amirghofran,<sup>b</sup> Shahram Tangestaninejad,<sup>\*a</sup> Majid Moghadam,<sup>\*a</sup> Valiollah Mirkhani<sup>a</sup> and Iraj mohammadpoor-Baltork<sup>a</sup>

<sup>a</sup> Department of Chemistry, Catalysis Division, University of Isfahan, Isfahan 81746-73441, Iran. E-mails: [stanges@sci.ui.ac.ir](mailto:stanges@sci.ui.ac.ir), [moghadamm@sci.ui.ac.ir](mailto:moghadamm@sci.ui.ac.ir).

<sup>b</sup> Immunology Department and Autoimmune Diseases Research Centre. Shiraz University of Medical Sciences, Shiraz. Iran.

#### **Table of Contents**

**Figure S1:** FTIR spectra of (a) lactose sugar, (b) capric acid, and(c) lactose caprate ester.

**Figure S2:** HPLC chromatograms of the reaction mixture of lactose and capric acid in acetone. at flow rate is 1 mL min<sup>-1</sup>.

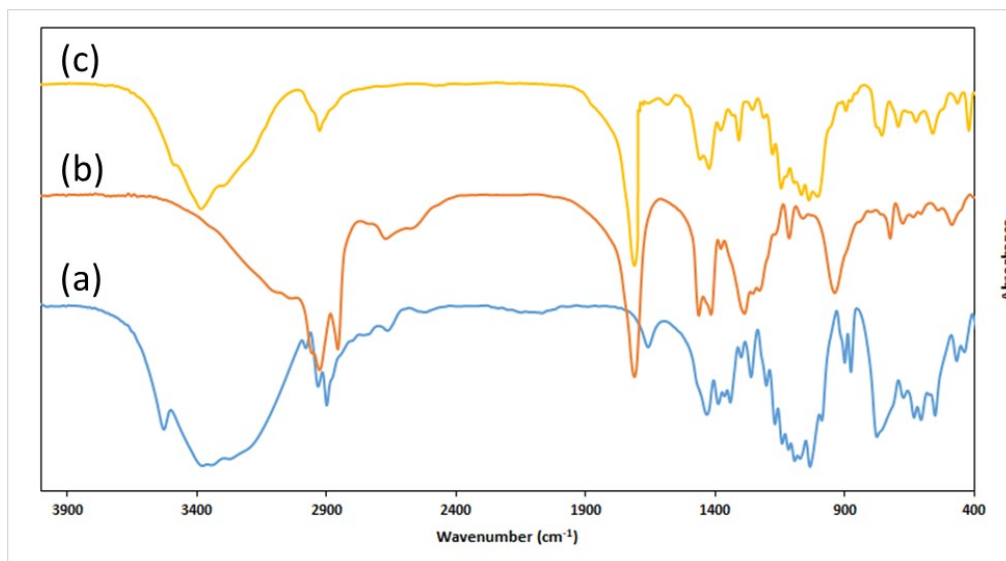

**Figure S1:** FTIR spectra of (a) lactose sugar, (b) capric acid, and (c) lactose caprate ester.

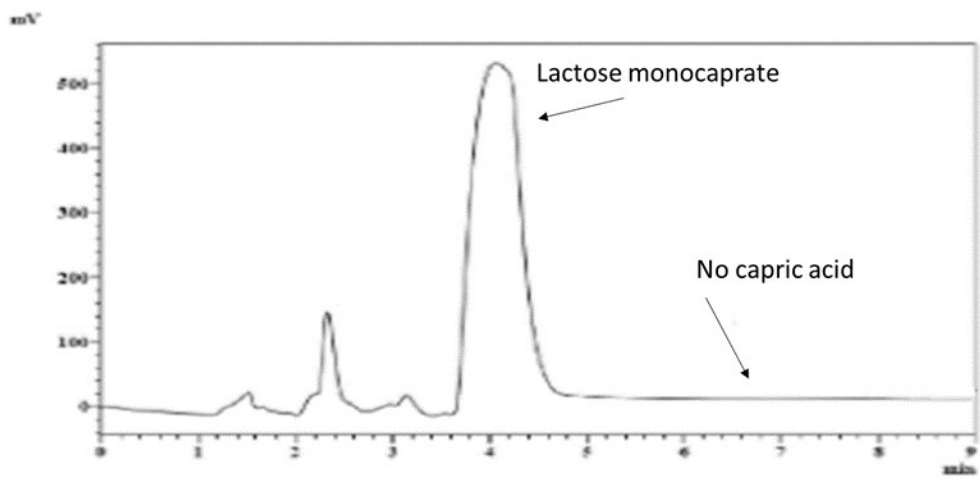

**Figure S2:** HPLC chromatograms of the reaction mixture of lactose and capric acid in acetone. Flow rate is 1 mLmin<sup>-1</sup>.
